# Supplementary material
Source: publisher site journal article supplement (https://www.spandidos-publications.com/3743/downloadSupplementary)

Figure S1. Different phenotypes of bicuspid aortic valve according to the cusp fusion and related frequency. L-NC, left-non coronary cusp fusion; R-L, right-left coronary cusp fusion; R-NC, right-non coronary cusp fusion; RCA, right coronary artery; LCA, left coronary artery.

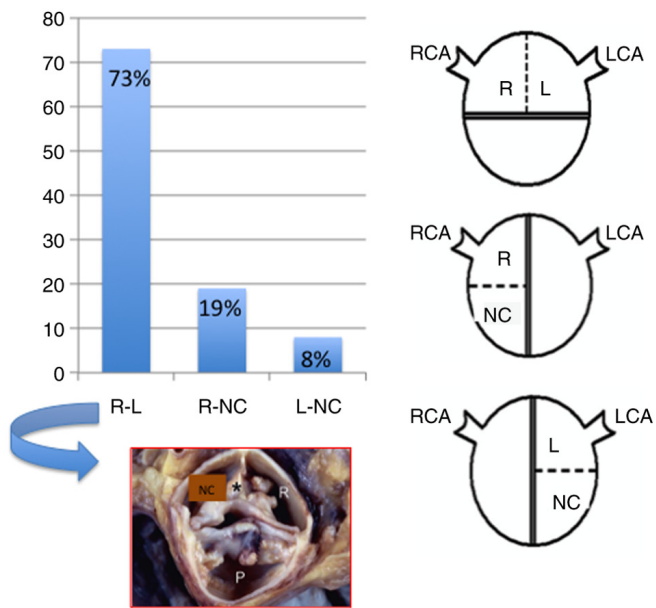

Supplement: Supplementary file 1 [file downloadSupplementary]
